# Supplementary material
Source: publisher site journal article supplement (https://www.dovepress.com/article/313952)
Supplement: Supplementary file 1 [file get_supplementary_file.php]

**Schedule 1. Sensitivity Analysis**

| Outcomes | HbA1c(%)  OR(95%CI) *P* | HbA1c(%) Category | | | | | P*P* for trend | |
| --- | --- | --- | --- | --- | --- | --- | --- | --- |
| Q1 | Q2  OR(95%CI) *P* | Q3  OR(95%CI)  *P* | Q4  OR(95%CI) *P* | |
| Preterm birth |  |  |  |  |  | |  | |
| Non-adjusted | 2.55 (1.76, 3.68) <0.0001 | Ref | 1.17 (0.85, 1.63) 0.3373 | 1.61 (1.18, 2.20) 0.0025 | | 1.77 (1.31, 2.40) 0.0002 | | <0.0001 |
| Adjust I | 2.41 (1.65, 3.52) <0.0001 | Ref | 1.16 (0.83, 1.61) 0.3791 | 1.57 (1.15, 2.15) 0.0050 | | 1.69 (1.24, 2.31) 0.0010 | | 0.0002 |
| Adjust II | 2.39 (1.63, 3.49) <0.0001 | Ref | 1.15 (0.83, 1.61) 0.3954 | 1.57 (1.14, 2.15) 0.0051 | | 1.68 (1.23, 2.30) 0.0012 | | 0.0002 |
| Macrosomia |  |  |  |  | |  | |  |
| Non-adjusted | 2.82 (2.04, 3.91) <0.0001 | Ref | 1.11 (0.83, 1.50) 0.4771 | 1.69 (1.28, 2.23 ) 0.0002 | | 2.03 (1.55, 2.65) <0.0001 | | <0.0001 |
| Adjust I | 1.91 (1.37, 2.67) 0.0001 | Ref | 1.01 (0.75, 1.36) 0.9545 | 1.45 (1.10, 1.92) 0.0089 | | 1.51 (1.15, 2.00) 0.0034 | | 0.0002 |
| Adjust II | 2.23 (1.58, 3.16) <0.0001 | Ref | 1.00 (0.74, 1.36) 0.9994 | 1.50 (1.13, 2.00) 0.0056 | | 1.65 (1.24, 2.19) 0.0005 | | <0.0001 |
| LGA |  |  |  |  | |  | |  |
| Non-adjusted | 2.27 (1.84, 2.80) <0.0001 | Ref | 1.14 (0.95, 1.37) 0.1469 | 1.47 (1.23, 1.75) <0.0001 | | 1.83 (1.54, 2.17) <0.0001 | | <0.0001 |
| Adjust I | 1.64 (1.32, 2.03) <0.0001 | Ref | 1.05 (0.87, 1.26) 0.6132 | 1.28 (1.07, 1.54) 0.0063 | | 1.43(1.20, 1.70) <0.0001 | | <0.0001 |
| Adjust II | 1.81 (1.45, 2.26) <0.0001 | Ref | 1.05 (0.87, 1.26) 0.6168 | 1.32 (1.10, 1.58) 0.0026 | | 1.52 (1.27, 1.82) <0.0001 | | <0.0001 |

Relationship between HbA1c and adverse birth outcomes in different models, excluding pregnant women with HbA1c within the range of 5.7–6.4%(n=54).

Abbreviations: OR, odds ratio; Ref, reference and LGA, large for gestational age.

Model Ⅰ adjusted for：maternal age, pre-pregnancy BMI.

## Model Ⅱ adjusted for：maternal age, pre-pregnancy BMI, gestational age at delivery, caesarean section, sex.（Preterm birth does not adjust gestational age at delivery）
